# Supplementary material for: Trends and projections of universal health coverage indicators in China, 1993–2030: An analysis of data from four nationwide household surveys
Source: PubMed Central journal article supplement — Lancet Reg Health West Pac. 2022 Nov 17;31:100646. doi: 10.1016/j.lanwpc.2022.100646 (PMC9676220; doi:10.1016/j.lanwpc.2022.100646), 2022-11-17
Supplement: mmc1.pdf [file mmc1.pdf]

## Supplementary appendix A

|                                                                                                                                        |    |
|----------------------------------------------------------------------------------------------------------------------------------------|----|
| Supplementary Notes .....                                                                                                              | 2  |
| Appendix Table 1. Classification of service coverage indicators by tracer areas .....                                                  | 11 |
| Appendix Table 2. Tests for differences in means between full and used sample in the waves of NHSS 2008 and CHNS 2009 .....            | 12 |
| Appendix Table 3. Trends of UHC indicators in 1997-1998, 2002-2004, and 2011-2013 .....                                                | 16 |
| Appendix Table 4. Trends in Composite prevention index by various subgroups within China, 1993-2018 .....                              | 17 |
| Appendix Table 5. Trends in Composite treatment index by various subgroups within China, 1993-2018 .....                               | 18 |
| Appendix Table 6. Relative inequality index (RII) in 1993, 2008, and 2018 .....                                                        | 19 |
| Appendix Table 7. Trends in Catastrophic health expenditure by various subgroups within China, 1993-2018 .....                         | 20 |
| Appendix Table 8. Trends in Medical impoverishment by various subgroups within China, 1993-2018 .....                                  | 21 |
| Appendix Table 9. Adjusted R squares used by general linear model, splines model and generalized additive model .....                  | 22 |
| Appendix Table 10. Sensitivity analysis of projections based on trends from 1993 to 2008 .....                                         | 23 |
| Appendix Table 11. Sensitivity analysis of UHC indicators based on trends from 2003 and 2018 .....                                     | 24 |
| Appendix Table 12. Results for composite prevention and treatment index using projections of CHNS indicators .....                     | 25 |
| Appendix Table 13. Sensitive analysis of meta-analysis .....                                                                           | 26 |
| Appendix Table 14. Confidence intervals (CIs) of composite prevention and treatment index after applying multiplicity correction ..... | 27 |
| Appendix Table 15. Confidence intervals (CIs) of financial protection indicators after applying multiplicity correction .....          | 28 |

## Supplementary Notes

### Description of four surveys used in this study

National Health Service Survey (NHSS) is a continuous cross-sectional survey implemented by the National Health Commission (NHC) of the People's Republic of China (1), aiming to identify the achievements and challenges in healthcare in the five years preceding the survey. NHSS is carried out every five years since 1993, and there are six waves (1993, 1998, 2003, 2008, 2013 and 2018) available so far. NHSS uses multi-stage stratified cluster random sampling strategy, covering 31 provinces (autonomous regions, and municipalities) in mainland China. NHSS is well representative at the national level and sub-region level. NHSS is widely used in research on health-related issues, such as healthcare utilization (2), medial expenditure (3), and determinants of health (4). Our study used all six waves for analysis, including 54984, 56994, 57023, 56456, 93613 and 94076 households, and 215163, 216101, 193689, 177501, 273688 and 256304 individuals in each wave.

China Health Nutrition Survey (CHNS) is a collaborative project between University of North Carolina at Chapel Hill and Chinese Center for Disease Control and Prevention. It uses a multi-stage random cluster sampling strategy to obtain sample households covering 31 provinces across China which varied largely in geography, economic development, public resources and health indicators. CHNS is used in research on nutrition (5), diseases prevalence and management (6), and determinants of health (7). CHNS data was first collected in 1989, and six waves are available by 2015. In consistence with the study period in NHSS, we used CHNS data in waves of 1993, 1997, 2004, 2009, 2011 and 2015. It is worth noting that during our study period, Heilongjiang province was added in 1997, while Beijing, Shanghai and Chongqing were added in 2011. Therefore, in consideration of continuity and comparison, we dropped the observations in Beijing, Shanghai and Chongqing in our study. As Heilongjiang was missed in only one wave, we kept its observations to ensure a large sample size. Finally, there are 13895, 14441, 12308, 12178, 15725 and 16622 individuals for each wave in our study.

Chinese Household Income Project (CHIP) is conducted by a team of Chinese and foreign researchers, and is implemented with the assistance of the National Bureau of Statistics (NBS), aiming to provide a dynamic assessment of income distribution in China. There are six waves available (1988, 1995, 2002, 2007, 2013 and 2018), and our study used the latest five waves. The sampling strategy varies slightly between each wave. In 1995, urban and rural sample were drawn from the NBS urban and rural household survey samples, respectively. Systematic sampling after sorting by income was used, yielding a sample covering 6868 urban households and 7998 rural households. Since 2002, CHIP has added a migrant sample to better reflect the characteristic of rural population mobility in China. The urban household survey, rural household survey and migrant survey were carried out by NBS, covering 6835, 9200 and 2000 households, respectively. In 2007, urban household samples, rural household samples and rural-urban migrant samples were included. The urban and rural household samples were drawn from the larger NBS household survey

samples conducted by NBS, while the migrant samples were collected by a separate survey. Finally, a sample covering 5000 urban households, 8000 rural households, and 5000 rural-urban migrant households were produced. There were still three types of household samples in 2013. However, they were all drawn from the NBS urban-rural integration household survey samples, yielding a sample of 7175 urban household, 11013 rural households, and 760 migrant households in 15 provinces. CHIP is used widely to discuss income-related issues in China, such as poverty (8) and income inequality (9), while health-related income issues were also frequently discussed (10,11).

RFPS is implemented by the Ministry of Agriculture, aiming to describe the social and economic picture in rural areas of China. RFPS is used to measure multiple dimensions of rural areas in China, such as poverty reduction (12) and rural health insurance (13). RFPS uses a multi-stage stratified random sampling strategy, and typically one village is selected in each county. RFPS data is collected based on the weekly accounting book in survey household, and covers detailed information of household income and expenditure, including total household expenditure and eight subcategories (13). RFPS has covered 23000 rural households of 360 villages in 31 provinces by 2017. RFPS was first carried out in 1986, and we used waves of 1995 and 2002 in our analysis to complement our results on financial protection in 1995 and 2002, given that questionnaires on household expenditures for rural households in CHIP 1995 and 2002 were not consistent with other waves.

## References:

1. Wang M, Luo X, Xu S, et al. Trends in smoking prevalence and implication for chronic diseases in China: serial national cross-sectional surveys from 2003 to 2013. *The Lancet Respiratory Medicine*. 2019;**7(1)**:35-45.
2. Zhang X, Wu Q, Shao Y, Fu W, Liu G, Coyte PC. Socioeconomic inequities in health care utilization in China. *Asia Pacific Journal of Public Health*. 2015;**27(4)**:429-38.
3. Meng Q, Xu L, Zhang Y, et al. Trends in access to health services and financial protection in China between 2003 and 2011: a cross-sectional study. *The Lancet*. 2012;**379(9818)**:805-14.
4. Xin Y, Qian J, Xu L, Tang S, Gao J, Critchley JA. The impact of smoking and quitting on household expenditure patterns and medical care costs in China. *Tobacco Control*. 2009;**18(2)**:150-5.
5. Su C, Zhao J, Wu Y, et al. Temporal Trends in Dietary Macronutrient Intakes among Adults in Rural China from 1991 to 2011: Findings from the CHNS. *Nutrients*. 2017;**9(3)**:227.
6. Guo J, Zhu Y-C, Chen Y-P, Hu Y, Tang X-W, Zhang B. The dynamics of hypertension prevalence, awareness, treatment, control and associated factors in Chinese adults: results from CHNS 1991–2011. *Journal of Hypertension*. 2015;**33(8)**:1688-96.
7. Xu X, Hall J, Byles J, Shi Z. Dietary Pattern Is Associated with Obesity in Older People in China: Data from China Health and Nutrition Survey (CHNS). *Nutrients*. 2015;**7(9)**:8170-88.
8. Huang JIN, Jin M, Deng SUO, Guo B, Zou LI, Sherraden M. Asset Poverty in Urban China: A Study Using the 2002 Chinese Household Income Project. *Journal of Social Policy*. 2013;**42(4)**:763-81.
9. Li S, Sicular T. The Distribution of Household Income in China: Inequality, Poverty and Policies. *The China Quarterly*. 2014;**217**:1-41.
10. Zhang Y, Gao Q. Does the Health Insurance Program Reduce Health-Induced Poverty?: New Evidence From the China Household Income Project. *Innovation in Aging*. 2021;**5(Suppl 1)**:353-.
11. Yingying B. Health Shock, Labor Participation and Welfare Level of Rural Families——An Empirical Analysis Based on China Household Income Project (CHIP 2013).
12. Fang C, Gai Q, He C, Shi Q. The Experience of Poverty Reduction in Rural China. *SAGE Open*. 2020;**10(4)**:2158244020982288.
13. Bai C-E, Wu B. Health insurance and consumption: Evidence from China's New Cooperative Medical Scheme. *Journal of Comparative Economics*. 2014;**42(2)**:450-69.

### Procedures of selecting indicators

Our selection of indicators is based on the framework proposed and recommended by the WHO and related international studies. This framework proposed by the WHO includes four tracer areas and 16 tracer indicators when monitoring UHC services coverage (1). The 16 indicators are family planning, antenatal care, DPT3 immunization, care-seeking behaviours for children with suspected pneumonia, tuberculosis treatment, HIV treatment, malaria prevention, water and sanitation, prevention of cardiovascular disease, management of diabetes, cancer detection and treatment, tobacco control, hospital access, health worker density, access to essential medicines, and health security. In addition, the existing studies on UHC progress evaluation include some other indicators such as postnatal care, exclusive breastfeeding, BCG immunization, polio3 immunization, measles immunization, non-overweight, institutional delivery, skilled birth attendance (2-4). We built a list of potential tracer indicators for our study based on the WHO report and these related studies. Then we select 24 indicators used in this study as follows.

First, we drop some indicators that are not suitable for measuring the UHC progress in China such as malaria prevention. China was certified malaria-free by the WHO in 2021 with no indigenous cases for four consecutive years and tremendous control efforts in the last 70 years (5). In fact, the incidence of malaria was extremely low during our study period. According to the China Health Statistics Yearbook, the incidence of malaria was 5.05 per 100,000 population in 1993 and dropped to 0.18 in 2018. Hence, we do not include it into our UHC framework.

Second, we select some indicators that are great important to measure China's conditions such as hepatitis B (HB3) immunization and non-underweight. China's burden of hepatitis B virus infection is the largest around the world (6). The Chinese government has given high priority to HB3 immunization for new-born babies since 1992 (7). Therefore, we include the indicator of HB3 immunization in our UHC framework. Similarly, China once had a high prevalence of malnutrition in 1990s (8) and low BMI is linked to some diseases as well, such as colorectal cancer (9). Therefore, in addition to the overweight indicator, we include the underweight indicator for our analysis.

Third, we have to drop some indicators due to unavailability of high-quality data sources. Some of them are replaced by other indicators with available data source. For example, we use outpatient and inpatient care seeking when needed for children aged 0-4 to be proxy for care-seeking behaviours for children with suspected pneumonia. We use outpatient and inpatient care seeking and travel time to the nearest medical facility to be proxy for hospital access and health worker density. As for other indicators such as diabetes management, cervical and breast cancer screening, there are no alternative indicators to replace them. In the discussion part, we would discuss this limitation and show how the data unavailability of these indicators would influence our results and conclusions.

As for financial protection, we use the two common indicators, including the incidences of catastrophic health expenditure and medical impoverishment. These two indicators have already been used in previous studies (10, 11).

#### Reference:

1. World Health Organization, World Bank. Tracking universal health coverage: 2017 global monitoring report. Geneva: World Health Organization; 2017.
2. Rahman MS, Rahman MM, Gilmour S, Swe KT, Krull Abe S, Shibuya K. Trends in, and projections of, indicators of universal health coverage in Bangladesh, 1995–2030: a Bayesian analysis of population-based household data. *Lancet Global Health*. 2018;**6(1)**:e84-e94.
3. Taniguchi H, Rahman MM, Swe KT, Hussain A, Shibuya K, Hashizume M. Trends and projections of universal health coverage indicators in Iraq, 2000–2030: A national and subnational study. *Social Science & Medicine*. 2021;**270**:113630.
4. Han SM, Rahman MM, Rahman MS, et al. Progress towards universal health coverage in Myanmar: a national and subnational assessment. *Lancet Global Health*. 2018;**6(9)**:e989-e97.
5. Burki T. Triumph in China as it is certified malaria-free by WHO. *The Lancet Infectious Diseases*. 2021;**21(9)**:1220-1.
6. Vellozzi C, Averhoff F. An opportunity for further control of hepatitis B in China? *The Lancet Infectious Diseases*. 2016;**16(1)**:10-1.
7. Fan R, Yin X, Liu Z, Liu Z, Lau G, Hou J. A hepatitis B-free generation in China: from dream to reality. *The Lancet Infectious Diseases*. 2016;**16(10)**:1103-5.
8. Du S, Lu B, Zhai F, Popkin BM. A new stage of the nutrition transition in China. *Public health nutrition*. 2002;**5(1a)**:169-74.
9. Balakrishnan VS. Low BMI linked to worse colorectal cancer outcomes. *The Lancet Oncology*. 2015;**16(16)**:e593.
10. Yip W, Fu H, Chen AT, et al. 10 years of health-care reform in China: progress and gaps in Universal Health Coverage. *The Lancet*. 2019;**394(10204)**:1192-204.
11. Ta Y, Zhu Y, Fu H. Trends in access to health services, financial protection and satisfaction between 2010 and 2016: Has China achieved the goals of its health system reform? *Social Science & Medicine*. 2020;**245**:112715.

Calculation of incidences of catastrophic health expenditure and medical impoverishment

In this study, the incidence of catastrophic health expenditure (CHE) refers to the proportion of households whose health expenditure exceeds a certain threshold of ability-to-pay or total expenditures. Formally it could be written as follows:

$$I_{cat} = \frac{1}{N} \sum_{i=1}^N P_i \quad (1)$$

$$P_i = \begin{cases} 1, & \frac{\text{Medical Expenditure}}{\text{Ability to Pay}} > CHE_{threshold} \\ 0, & \text{Otherwise} \end{cases} \quad (2)$$

where  $I_{cat}$  is the incidence of CHE;  $P_i$  is the catastrophic measure;  $N$  is the sample size.

$$\text{When } CHE_{threshold} \text{ is } 0.4, \frac{\text{Medical Expenditure}}{\text{Ability to Pay}} = \frac{\text{Medical Expenditure}}{\text{Total Exp} - \text{Food Exp}}.$$

$$\text{When } CHE_{threshold} \text{ is } 0.25 \text{ and } 0.1, \frac{\text{Medical Expenditure}}{\text{Ability to Pay}} = \frac{\text{Medical Expenditure}}{\text{Total Exp}}.$$

We measure impoverishment incidence as the change in poverty headcount with and without including out-of-pocket healthcare spending in total consumption. Formally it could be written as follows:

$$H_{POV}^{Pre(Post)} = \frac{1}{N} \sum_{i=1}^N P_i^{Pre(Post)} \quad (3)$$

$$PI = H_{POV}^{Post} - H_{POV}^{Pre} \quad (4)$$

where  $H_{POV}^{Pre}$  denotes is the incidence (Headcount) of poverty when including health spending;  $P_i^{Pre}$  equal to 1, if  $\text{Expenditure per capita} < \text{Poverty line}$  and zero otherwise.  $H_{POV}^{Post}$  denotes is the incidence (Headcount) of poverty when excluding health spending;  $P_i^{Post}$  equal to 1, if  $\text{Expenditure per capita} - \text{Medical Expenditure} < \text{Poverty line}$  and zero otherwise.  $PI$  is the incidence of medical impoverishment, measured by the change in the incidence (Headcount) of poverty.

### Weighting method for estimating financial protection indicators

We used the CHIP dataset to calculate the incidence of catastrophic health expenditure (CHE) and medical impoverishment in urban area in 1995 and 2002, and that in both rural and urban areas in 2007, 2013 and 2018. We used RFPS dataset to calculate the incidence of CHE and medical impoverishment in rural area in 1995 and 2002 to complement our results. The critical consideration in using RFPS was the inconsistency in questionnaire questions in CHIP. Specifically, the CHIP survey investigated the net household income in rural area in 1995 and 2002 but recorded the annual household income after 2007. However, the RFPS collected the annual total income in rural areas, which was more consistent with the CHIP survey after 2002.

We used the method of weighting recommended by a previous study (1). The overall strategy we used was dividing China into several subregions based on regions (eastern, central and western regions) and areas (urban and rural areas). The division of areas and regions was in line with the categories of the National Bureau of Statistics. Specifically, the eastern region includes Beijing, Tianjin, Shanghai, Hebei, Liaoning, Jiangsu, Zhejiang, Fujian, Shandong, Guangdong and Hainan, the central region includes Shanxi, Jilin, Heilongjiang, Anhui, Jiangxi, Henan, Hubei and Hunan, and the western region includes Inner Mongolia, Guangxi, Sichuan, Chongqing, Guizhou, Yunnan, Tibet, Shaanxi, Gansu, Qinghai, Ningxia and Xinjiang. It is worth noting that in order to align with the sampling technique, we selected Beijing, Tianjin and Shanghai as the representativeness of the municipalities (Chongqing was not a municipality in 1995. Hence, in order to be consistent, Chongqing was divided into western region) in CHIP dataset. Hence, we divided China into the following parts: the urban area in eastern region, the rural area in eastern region, the urban area in central region, the rural area in central region, the urban area in western region and the rural area in western region (The CHIP dataset also includes the urban area in municipalities and the rural area in municipality).

The formula of weighting is shown as follows:

$$w_i^k = \left( \frac{N^k * n}{n^k * N} \right) * \frac{N}{n} = \frac{S^k}{s^k} * \frac{N}{n}$$

$S^k$  represents the proportion of the population in category k among the national population.  $s^k$  represents the population in category k among the total population in the sample.  $N$  represents the national population.  $n$  represents the total population in the sample. As the incidence of CHE and Medical impoverishment were household-based, we still need to multiply the individual-level weights by family size to acquire the household-level weights.

For example, we obtained the national population and the population of the rural area in eastern region from the China Statistical Yearbook and the China Rural Statistical Yearbook. We calculated the total population and the population of the rural area in eastern region in the sample. Then we divided the proportion of the population of the rural area in eastern region among the national



population by the corresponding proportion in the sample, divided the national population by the total population in the sample, and multiplied the two together. Then we multiplied it by their family size to obtain final weights.

References:

1. Li S, Zuo T, Shi T. Analysis of the Change of China's Income Gap: A Research on Income Distribution in China IV 2013.

Distribution of non-information prior in Bayesian linear model.

$y_i$  represents the value of the proportion of each indicator after logit transforming, and its distribution is as follows:

$$y_i \sim N(\mu_i, \sigma_i^2)$$

The distribution of the conditional mean  $\mu_i$  is as follows:

$$\mu_i = \beta_0 + \beta_1 x_i$$

$x_i$  represents the year,  $\beta_0$  is the intercept term, and  $\beta_1$  is the coefficient. The prior distributions of  $\beta_0$  and  $\beta_1$  are as follows:

$$\beta_0 \sim N(0, 0.0001)$$

$$\beta_1 \sim N(0, 0.0001)$$

and

$$\sigma^2 \sim N(0.0001, 100)$$

**Appendix Table 1. Classification of service coverage indicators by tracer areas**

| <b>Tracer area</b>                                        | <b>Prevention indicator</b>                                                                                                                                                                                                                                                            | <b>Treatment indicator</b>                                                                                                                                                                                                        |
|-----------------------------------------------------------|----------------------------------------------------------------------------------------------------------------------------------------------------------------------------------------------------------------------------------------------------------------------------------------|-----------------------------------------------------------------------------------------------------------------------------------------------------------------------------------------------------------------------------------|
| Reproductive, maternal, new-born and child health (RMNCH) | <ul style="list-style-type: none"> <li>• At least four antenatal care visits (ANC4)</li> <li>• Postnatal care of mother</li> <li>• BCG immunization</li> <li>• DPT3 immunization</li> <li>• Polio3 immunization</li> <li>• Measles immunization</li> <li>• HB3 immunization</li> </ul> | <ul style="list-style-type: none"> <li>• Institutional delivery</li> <li>• Skilled birth attendance</li> <li>• Outpatient care seeking when needed (aged 0-4)</li> <li>• Inpatient care seeking when needed (aged 0-4)</li> </ul> |
| Infectious diseases                                       | <ul style="list-style-type: none"> <li>• Improved water</li> <li>• Adequate sanitation</li> </ul>                                                                                                                                                                                      | <ul style="list-style-type: none"> <li>• Tuberculosis treatment</li> </ul>                                                                                                                                                        |
| Non-communicable diseases                                 | <ul style="list-style-type: none"> <li>• Non-use of tobacco</li> <li>• Non-overweight</li> <li>• Non-underweight</li> </ul>                                                                                                                                                            | <ul style="list-style-type: none"> <li>• Normal blood pressure</li> <li>• Hypertension awareness</li> <li>• Hypertension treatment</li> <li>• Hypertension control</li> </ul>                                                     |
| Service capacity and access                               |                                                                                                                                                                                                                                                                                        | <ul style="list-style-type: none"> <li>• Outpatient care seeking when needed</li> <li>• Inpatient care seeking when needed</li> <li>• Travel time to the nearest medical facility</li> </ul>                                      |

Notes: BCG = Bacillus Calmette - Guerin vaccine. DPT3 = three doses of diphtheria, pertussis, and tetanus vaccine. Polio3 = three doses of polio vaccine. HB3 = three doses of Hepatitis B vaccine.

**Appendix Table 2. Tests for differences in means between full and used sample in the waves of NHSS 2008 and CHNS 2009**

|                                               | Full sample |                          | Used sample |                          | P-value of differences |
|-----------------------------------------------|-------------|--------------------------|-------------|--------------------------|------------------------|
|                                               | N           | % (95% CI)               | N           | % (95% CI)               |                        |
| <b>Pregnancy and delivery care</b>            |             |                          |             |                          |                        |
| Area                                          |             |                          |             |                          |                        |
| Urban                                         | 1478        | 19·0(18·2-19·9)          | 1453        | 19·2(18·4-20·1)          | p=0·75                 |
| Rural                                         | 6290        | 81·0(80·1-81·8)          | 6104        | 80·8(79·9-81·6)          | p=0·75                 |
| Region                                        |             |                          |             |                          |                        |
| Eastern                                       | 2570        | 33·1(32·0-34·1)          | 2531        | 33·5(32·4-34·6)          | p=0·59                 |
| Central                                       | 2078        | 26·8(25·8-27·7)          | 2006        | 26·5(25·6-27·6)          | p=0·77                 |
| Western                                       | 3120        | 40·2(39·1-41·3)          | 3020        | 40·0(38·9-41·1)          | p=0·80                 |
| Income (mean, 95% CI)                         |             |                          |             |                          |                        |
| All                                           | 7756        | 5357·2(5186·9-5527·5)    | 7545        | 5389·6(5215·2-5564·1)    | p=0·79                 |
| Q1                                            | 2460        | 1730·0(1706·4-1753·6)    | 2381        | 1733·8(1709·9-1757·7)    | p=0·83                 |
| Q2                                            | 2218        | 3444·1(3423·6-3464·5)    | 2161        | 3443·0(3422·2-3463·7)    | p=0·94                 |
| Q3                                            | 1904        | 5884·1(5837·9-5930·4)    | 1845        | 5881·7(5834·7-5928·7)    | p=0·94                 |
| Q4                                            | 1174        | 15717·5(14827·1-16607·9) | 1158        | 15755·4(14854·2-16656·5) | p=0·95                 |
| <b>Child immunization</b>                     |             |                          |             |                          |                        |
| Area                                          |             |                          |             |                          |                        |
| Urban                                         | 1647        | 17·1(16·3-17·9)          | 1609        | 17·0(16·3-17·8)          | p=0·92                 |
| Rural                                         | 7992        | 82·9(82·1-83·7)          | 7839        | 83·0(82·2-83·7)          | p=0·92                 |
| Region                                        |             |                          |             |                          |                        |
| Eastern                                       | 2837        | 29·4(28·5-30·4)          | 2794        | 29·6(28·7-30·5)          | p=0·83                 |
| Central                                       | 2804        | 29·1(28·2-30·0)          | 2751        | 29·1(28·2-30·0)          | p=0·97                 |
| Western                                       | 3998        | 41·5(40·5-42·5)          | 3903        | 41·3(40·3-42·3)          | p=0·82                 |
| Income (mean, 95% CI)                         |             |                          |             |                          |                        |
| All                                           | 9625        | 4826·9(4698·5-4955·2)    | 9436        | 4832·7(4702·4-4962·9)    | p=0·95                 |
| Q1                                            | 3473        | 1707·5(1687·6-1727·3)    | 3393        | 1708·6(1688·6-1728·7)    | p=0·94                 |
| Q2                                            | 2744        | 3430·8(3412·4-3449·2)    | 2698        | 3428·6(3410·1-3447·1)    | p=0·87                 |
| Q3                                            | 2198        | 5858·4(5815·7-5901·1)    | 2162        | 5862·4(5819·3-5905·5)    | p=0·90                 |
| Q4                                            | 1210        | 15072·6(14304·3-15840·8) | 1183        | 15113·4(14329·6-15897·1) | p=0·94                 |
| <b>Household conditions related to health</b> |             |                          |             |                          |                        |
| Area                                          |             |                          |             |                          |                        |
| Urban                                         | 16802       | 29·8(29·4-30·1)          | 16728       | 29·7(29·3-30·1)          | p=0·83                 |
| Rural                                         | 39654       | 70·2(69·9-70·6)          | 39590       | 70·3(69·9-70·7)          | p=0·83                 |
| Region                                        |             |                          |             |                          |                        |
| Eastern                                       | 19198       | 34·0(33·6-34·4)          | 19165       | 34·0(33·6-34·4)          | p=0·93                 |
| Central                                       | 16799       | 29·8(29·4-30·1)          | 16781       | 29·8(29·4-30·2)          | p=0·88                 |
| Western                                       | 20459       | 36·2(35·8-36·6)          | 20372       | 36·2(35·8-36·6)          | p=0·82                 |
| Income (mean, 95% CI)                         |             |                          |             |                          |                        |
| All                                           | 56380       | 6596·2(6530·5-6661·8)    | 56244       | 6591·4(6525·7-6657·2)    | p=0·92                 |
| Q1                                            | 15116       | 1700·4(1690·6-1710·2)    | 15085       | 1700·6(1690·8-1710·4)    | p=0·98                 |
| Q2                                            | 13076       | 3436·8(3428·5-3445·2)    | 13056       | 3436·7(3428·3-3445·1)    | p=0·98                 |
| Q3                                            | 14690       | 5971·8(5954·6-5989·1)    | 14655       | 5972·0(5954·7-5989·2)    | p=0·99                 |
| Q4                                            | 13498       | 15818·9(15619·0-16018·8) | 13448       | 15815·5(15615·0-16015·9) | p=0·98                 |

(continued)

|                                           | Raw data   |                          | Used data  |                          | P-value of differences |
|-------------------------------------------|------------|--------------------------|------------|--------------------------|------------------------|
| N                                         | % (95% CI) | N                        | % (95% CI) |                          |                        |
| <b>No-use of tobacco</b>                  |            |                          |            |                          |                        |
| Area                                      |            |                          |            |                          |                        |
| Urban                                     | 3609       | 33·9(33·0-34·8)          | 3608       | 33·9(33·0-34·8)          | p=0·98                 |
| Rural                                     | 7038       | 66·1(65·2-67·0)          | 7032       | 66·1(65·2-67·0)          | p=0·98                 |
| Region                                    |            |                          |            |                          |                        |
| Eastern                                   | 3482       | 32·7(31·8-33·6)          | 3479       | 32·7(31·8-33·6)          | p=0·99                 |
| Central                                   | 4582       | 43·0(42·1-44·0)          | 4579       | 43·0(42·1-44·0)          | p=1·00                 |
| Western                                   | 2583       | 24·3(23·5-25·1)          | 2582       | 24·3(23·5-25·1)          | p=0·99                 |
| Income (mean, 95% CI)                     |            |                          |            |                          |                        |
| All                                       | 10518      | 10771·7(10506·1-11037·3) | 10512      | 10772·3(10506·6-11038·0) | p=1·00                 |
| Q1                                        | 2502       | 1951·8(1908·7-1994·9)    | 2500       | 1951·5(1908·4-1994·6)    | p=0·99                 |
| Q2                                        | 2768       | 5433·5(5393·2-5473·7)    | 2767       | 5434·1(5393·9-5474·4)    | p=0·98                 |
| Q3                                        | 2702       | 10178·6(10111·0-10246·3) | 2700       | 10178·2(10110·5-10245·9) | p=0·99                 |
| Q4                                        | 2546       | 25872·3(25042·2-26702·3) | 2545       | 25871·3(25040·9-26701·7) | p=1·00                 |
| <b>Non-overweight and Non-underweight</b> |            |                          |            |                          |                        |
| Area                                      |            |                          |            |                          |                        |
| Urban                                     | 2811       | 33·5(32·5-34·5)          | 2585       | 32·7(31·6-33·7)          | p=0·26                 |
| Rural                                     | 5583       | 66·5(65·5-67·5)          | 5329       | 67·3(66·3-68·4)          | p=0·26                 |
| Region                                    |            |                          |            |                          |                        |
| Eastern                                   | 2755       | 32·8(31·8-33·8)          | 2672       | 33·8(32·7-34·8)          | p=0·20                 |
| Central                                   | 3738       | 44·5(43·5-45·6)          | 3521       | 44·5(43·4-45·6)          | p=0·96                 |
| Western                                   | 1901       | 22·6(21·8-23·6)          | 1721       | 21·7(20·9-22·7)          | p=0·17                 |
| Income (mean, 95% CI)                     |            |                          |            |                          |                        |
| All                                       | 8314       | 11000·4(10687·2-11313·7) | 7837       | 10955·1(10646·9-11263·4) | p=0·84                 |
| Q1                                        | 1850       | 1960·4(1910·4-2010·4)    | 1734       | 1970·1(1918·5-2021·8)    | p=0·79                 |
| Q2                                        | 2238       | 5449·6(5404·9-5494·3)    | 2104       | 5446·9(5400·9-5492·8)    | p=0·93                 |
| Q3                                        | 2193       | 10163·6(10088·9-10238·2) | 2071       | 10171·6(10094·8-10248·4) | p=0·88                 |
| Q4                                        | 2033       | 26240·1(25247·0-27233·2) | 1928       | 25888·7(24938·4-26839·1) | p=0·62                 |
| <b>Normal blood pressure</b>              |            |                          |            |                          |                        |
| Area                                      |            |                          |            |                          |                        |
| Urban                                     | 3744       | 33·4(32·6-34·3)          | 3491       | 32·8(31·9-33·7)          | p=0·32                 |
| Rural                                     | 7450       | 66·6(65·7-67·4)          | 7148       | 67·2(66·3-68·1)          | p=0·32                 |
| Region                                    |            |                          |            |                          |                        |
| Eastern                                   | 3610       | 32·2(31·4-33·1)          | 3526       | 33·1(32·3-34·0)          | p=0·16                 |
| Central                                   | 4797       | 42·9(41·9-43·8)          | 4556       | 42·8(41·9-43·8)          | p=0·97                 |
| Western                                   | 2787       | 24·9(24·1-25·7)          | 2557       | 24·0(23·2-24·9)          | p=0·14                 |
| Income (mean, 95% CI)                     |            |                          |            |                          |                        |
| All                                       | 11059      | 10619·2(10364·2-10874·3) | 10510      | 10642·5(10389·3-10895·6) | p=0·90                 |
| Q1                                        | 2686       | 1953·1(1911·6-1994·5)    | 2531       | 1959·0(1916·4-2001·5)    | p=0·85                 |
| Q2                                        | 2927       | 5428·9(5389·8-5468·0)    | 2763       | 5429·5(5389·4-5469·6)    | p=0·98                 |
| Q3                                        | 2824       | 10167·4(10101·4-10233·4) | 2697       | 10172·0(10104·3-10239·6) | p=0·93                 |
| Q4                                        | 2622       | 25777·7(24968·2-26587·1) | 2519       | 25589·1(24811·3-26366·8) | p=0·74                 |

(continued)

|                               | Raw data |                          | Used data |                          | P-value of differences |
|-------------------------------|----------|--------------------------|-----------|--------------------------|------------------------|
|                               | N        | % (95% CI)               | N         | % (95% CI)               |                        |
| <b>Hypertension awareness</b> |          |                          |           |                          |                        |
| Area                          |          |                          |           |                          |                        |
| Urban                         | 1021     | 34.7(33.0-36.5)          | 1018      | 34.8(33.1-36.6)          | p=0.95                 |
| Rural                         | 1918     | 65.3(63.5-67.0)          | 1906      | 65.2(63.4-66.9)          | p=0.95                 |
| Region                        |          |                          |           |                          |                        |
| Eastern                       | 1168     | 39.7(38.0-41.5)          | 1163      | 39.8(38.0-41.6)          | p=0.98                 |
| Central                       | 1257     | 42.8(41.0-44.6)          | 1250      | 42.7(41.0-44.6)          | p=0.99                 |
| Western                       | 514      | 17.5(16.2-18.9)          | 511       | 17.5(16.1-18.9)          | p=0.99                 |
| Income (mean, 95% CI)         |          |                          |           |                          |                        |
| All                           | 2892     | 11185.6(10711.0-11660.2) | 2877      | 11196.2(10719.9-11672.6) | p=0.98                 |
| Q1                            | 675      | 1910.6(1827.5-1993.7)    | 669       | 1910.1(1826.7-1993.6)    | p=0.99                 |
| Q2                            | 698      | 5458.2(5377.6-5538.8)    | 695       | 5460.3(5379.8-5540.9)    | p=0.97                 |
| Q3                            | 735      | 10145.7(10012.9-10278.5) | 733       | 10151.2(10018.2-10284.2) | p=0.95                 |
| Q4                            | 784      | 25245.1(23994.8-26495.5) | 780       | 25253.8(23997.6-26509.9) | p=0.99                 |
| <b>Hypertension treatment</b> |          |                          |           |                          |                        |
| Area                          |          |                          |           |                          |                        |
| Urban                         | 1021     | 34.7(33.0-36.5)          | 1018      | 34.9(33.1-36.6)          | p=0.93                 |
| Rural                         | 1918     | 65.3(63.5-67.0)          | 1903      | 65.1(63.4-66.9)          | p=0.93                 |
| Region                        |          |                          |           |                          |                        |
| Eastern                       | 1168     | 39.7(38.0-41.5)          | 1163      | 39.8(38.1-41.6)          | p=0.95                 |
| Central                       | 1257     | 42.8(41.0-44.6)          | 1247      | 42.7(40.9-44.5)          | p=0.95                 |
| Western                       | 514      | 17.5(16.2-18.9)          | 511       | 17.5(16.2-18.9)          | p=1.00                 |
| Income (mean, 95% CI)         |          |                          |           |                          |                        |
| All                           | 2892     | 11185.6(10711.0-11660.2) | 2874      | 11195.8(10719.0-11672.6) | p=0.98                 |
| Q1                            | 675      | 1910.6(1827.5-1993.7)    | 669       | 1910.1(1826.7-1993.6)    | p=0.99                 |
| Q2                            | 698      | 5458.2(5377.6-5538.8)    | 694       | 5462.2(5381.6-5542.8)    | p=0.95                 |
| Q3                            | 735      | 10145.7(10012.9-10278.5) | 732       | 10153.9(10020.8-10286.9) | p=0.93                 |
| Q4                            | 784      | 25245.1(23994.8-26495.5) | 779       | 25257.3(23999.6-26515.1) | p=0.99                 |
| <b>Hypertension control</b>   |          |                          |           |                          |                        |
| Area                          |          |                          |           |                          |                        |
| Urban                         | 1021     | 34.7(33.0-36.5)          | 1003      | 34.6(32.9-36.4)          | p=0.93                 |
| Rural                         | 1918     | 65.3(63.5-67.0)          | 1894      | 65.4(63.6-67.1)          | p=0.93                 |
| Region                        |          |                          |           |                          |                        |
| Eastern                       | 1168     | 39.7(38.0-41.5)          | 1156      | 39.9(38.1-41.7)          | p=0.90                 |
| Central                       | 1257     | 42.8(41.0-44.6)          | 1242      | 42.9(41.1-44.7)          | p=0.94                 |
| Western                       | 514      | 17.5(16.2-18.9)          | 499       | 17.2(15.9-18.6)          | p=0.79                 |
| Income (mean, 95% CI)         |          |                          |           |                          |                        |
| All                           | 2892     | 11185.6(10711.0-11660.2) | 2850      | 11127.9(10652.2-11603.5) | p=0.87                 |
| Q1                            | 675      | 1910.6(1827.5-1993.7)    | 668       | 1906.5(1823.0-1990.0)    | p=0.95                 |
| Q2                            | 698      | 5458.2(5377.6-5538.8)    | 691       | 5453.2(5372.0-5534.5)    | p=0.93                 |
| Q3                            | 735      | 10145.7(10012.9-10278.5) | 725       | 10148.6(10014.7-10282.6) | p=0.98                 |
| Q4                            | 784      | 25245.1(23994.8-26495.5) | 766       | 25215.3(23953.9-26476.7) | p=0.97                 |

(continued)

|                         | Raw data |                          | Used data |                          | P-value of differences |
|-------------------------|----------|--------------------------|-----------|--------------------------|------------------------|
|                         | N        | % (95% CI)               | N         | % (95% CI)               |                        |
| <b>Incidence of CHE</b> |          |                          |           |                          |                        |
| Area                    |          |                          |           |                          |                        |
| Urban                   | 4999     | 38.5(37.6-39.3)          | 4986      | 38.4(37.6-39.2)          | p=0.92                 |
| Rural                   | 8000     | 61.5(60.7-62.4)          | 8000      | 61.6(60.8-62.4)          | p=0.92                 |
| Region                  |          |                          |           |                          |                        |
| Eastern                 | 5400     | 43.2(42.3-44.1)          | 5399      | 43.2(42.4-44.1)          | p=0.96                 |
| Central                 | 4499     | 36.0(35.2-36.8)          | 4491      | 36.0(35.1-36.8)          | p=0.96                 |
| Western                 | 2600     | 20.8(20.1-21.5)          | 2596      | 20.8(20.1-21.5)          | p=0.98                 |
| Income (mean, 95% CI)   |          |                          |           |                          |                        |
| All                     | 12974    | 11103.1(10860.7-11345.6) | 12961     | 11100.7(10858-11343.4)   | p=0.99                 |
| Q1                      | 3248     | 4128.9(4023.0-4234.8)    | 3243      | 4124.7(4018.7-4230.6)    | p=0.96                 |
| Q2                      | 3242     | 7299.3(7128.5-7470.2)    | 3238      | 7292.5(7121.6-7463.4)    | p=0.96                 |
| Q3                      | 3242     | 10908.0(10652.0-11164.0) | 3239      | 10902.0(10645.9-11158.2) | p=0.97                 |
| Q4                      | 3242     | 22089.3(21303.0-22875.6) | 3241      | 22084.4(21297.9-22870.9) | p=0.99                 |
| <b>Incidence of MI</b>  |          |                          |           |                          |                        |
| Area                    |          |                          |           |                          |                        |
| Urban                   | 4999     | 38.5(37.6-39.3)          | 4977      | 38.5(37.7-39.4)          | p=0.89                 |
| Rural                   | 8000     | 61.5(60.7-62.4)          | 7936      | 61.5(60.6-62.3)          | p=0.89                 |
| Region                  |          |                          |           |                          |                        |
| Eastern                 | 5400     | 43.2(42.3-44.1)          | 5349      | 43.1(42.2-44.0)          | p=0.85                 |
| Central                 | 4499     | 36.0(35.2-36.8)          | 4477      | 36.1(35.2-36.9)          | p=0.92                 |
| Western                 | 2600     | 20.8(20.1-21.5)          | 2588      | 20.8(20.1-21.6)          | p=0.94                 |
| Income (mean, 95% CI)   |          |                          |           |                          |                        |
| All                     | 12974    | 11103.1(10860.7-11345.6) | 12913     | 11124.9(10881.4-11368.3) | p=0.90                 |
| Q1                      | 3244     | 2420.2(2394.0-2446.3)    | 3219      | 2428.4(2402.4-2454.5)    | p=0.66                 |
| Q2                      | 3268     | 4933.1(4902.9-4963.4)    | 3254      | 4933.8(4903.5-4964.1)    | p=0.98                 |
| Q3                      | 3219     | 9773.7(9700.9-9846.4)    | 3202      | 9769.1(9696.2-9842.0)    | p=0.93                 |
| Q4                      | 3243     | 27326.0(26629.0-28023.1) | 3238      | 27332.6(26634.6-28030.6) | p=0.99                 |

Note: This table shows differences in means of some demographic and income variables between the full sample and the used sample in the waves of NHSS 2008, CHNS 2009, and CHIP 2007. There were no missing data in indicators of Tuberculosis treatment, Outpatient care seeking, Outpatient care seeking (aged 0-4), Inpatient care seeking, and Inpatient care seeking (aged 0-4). To save space, we appended ANC4, Postnatal care of mother, Institutional delivery, and Skilled birth attendance into Pregnancy and delivery care, appended BCG immunization, DPT3 immunization, Polio3 immunization, Measles immunization, HB3 immunization into Child immunization, appended Improved water, Adequate sanitation, and Time to the nearest medical facility into Household conditions related to health. ANC4 = At least four antenatal care visits; BCG = Bacillus Calmette - Guerin vaccine. DPT3 = three doses of diphtheria, pertussis, and tetanus vaccine. Polio3 = three doses of polio vaccine. HB3 = three doses of Hepatitis B vaccine. 95% confidence intervals are reported in parentheses.

**Appendix Table 3. Trends of UHC indicators in 1997-1998, 2002-2004, and 2011-2013**

|                                                | Coverage in year (95% confidence interval) |                 |                 |
|------------------------------------------------|--------------------------------------------|-----------------|-----------------|
|                                                | 1997-1998                                  | 2002-2004       | 2011-2013       |
| <b>Prevention indicators</b>                   |                                            |                 |                 |
| At least four antenatal care visits            | 42.4(40.9-43.9)                            | 53.7(52.7-54.7) | 81.4(80.7-82.1) |
| Postnatal care of mother                       | 52.2(50.7-53.7)                            | 53.3(52.3-54.3) | 64.2(63.3-65.1) |
| BCG immunization                               | 93.5(85.1-98.0) <sup>†</sup>               | 95.9(95.5-96.3) | 98.7(98.5-98.9) |
| DPT3 immunization                              | 85.2(75.0-92.5) <sup>†</sup>               | 88.4(87.7-89.1) | 92.5(92.1-92.9) |
| Polio3 immunization                            | 86.8(77.0-93.8) <sup>†</sup>               | 89.8(89.2-90.4) | 93.7(93.3-94.1) |
| Measles immunization                           | 88.6(74.4-96.4) <sup>†</sup>               | 94.3(93.8-94.8) | 97.3(97.0-97.6) |
| HB3 immunization                               | 72.1(46.1-88.8) <sup>†</sup>               | 80.2(79.4-81.0) | 93.3(92.9-93.7) |
| Non-use of tobacco                             | 71.6(70.8-72.4)                            | 73.4(72.6-74.3) | 74.5(73.6-75.3) |
| Non-overweight                                 | 73.9(73.0-74.9)                            | 64.1(63.1-65.2) | 55.9(54.8-57.1) |
| Non-underweight                                | 93.0(92.4-93.5)                            | 94.6(94.0-95.0) | 95.1(94.6-95.6) |
| Improved water                                 | 46.5(46.1-46.9)                            | 52.2(51.8-52.6) | 75.0(74.7-75.3) |
| Adequate sanitation                            | 23.1(22.8-23.5)                            | 27.1(26.7-27.5) | 54.1(53.8-54.4) |
| <b>Composite prevention index</b>              | 71.1(55.8-84.3)                            | 75.0(59.1-88.0) | 84.2(73.6-92.5) |
| <b>Treatment indicators</b>                    |                                            |                 |                 |
| Institutional delivery                         | 50.3(48.8-51.8)                            | 68.3(67.3-69.3) | 96.3(96.0-96.6) |
| Skilled birth attendance                       | 79.8(78.6-81.1)                            | 84.1(83.4-84.9) | 97.3(97.0-97.6) |
| Normal blood pressure                          | 83.5(82.8-84.2)                            | 78.0(77.2-78.8) | 73.6(72.7-74.4) |
| Hypertension awareness                         | 23.8(21.9-25.8)                            | 37.5(35.5-39.5) | 52.3(50.4-54.2) |
| Hypertension treatment                         | 15.6(14.0-17.3)                            | 27.3(25.5-29.1) | 42.5(40.7-44.4) |
| Hypertension control                           | 4.4(3.6-5.5)                               | 10.9(9.7-12.3)  | 15.0(13.7-16.4) |
| Tuberculosis treatment                         | 74.1(67.5-80.7)                            | 65.8(58.1-73.5) | 83.0(75.4-90.6) |
| Outpatient care seeking when needed            | 61.9(61.4-62.4)                            | 51.1(50.5-51.7) | 72.7(72.4-73.0) |
| Outpatient care seeking when needed (aged 0-4) | 80.7(79.1-82.3)                            | 76.3(73.9-78.7) | 85.6(83.9-87.3) |
| Inpatient care seeking when needed             | 64.1(63.0-65.2)                            | 72.5(71.5-73.5) | 82.8(82.3-83.3) |
| Inpatient care seeking when needed (aged 0-4)  | 86.4(82.5-90.3)                            | 93.4(90.4-96.5) | 92.6(91.1-94.1) |
| Travel time to the nearest medical facility    | 68.8(68.4-69.2)                            | 71.2(70.8-71.6) | 73.6(73.4-73.9) |
| <b>Composite treatment index</b>               | 57.4(47.5-67.1)                            | 62.1(52.2-71.4) | 74.8(66.2-82.6) |
| <b>Financial protection</b>                    |                                            |                 |                 |
| Catastrophic health expenditure                |                                            | 5.6(5.0-6.2)    | 5.1(4.7-5.5)    |
| Medical impoverishment                         |                                            | 1.2(1.0-1.5)    | 1.3(1.1-1.5)    |

Notes: The results for immunization rates in 1998 were imputed using Bayesian linear regression. Hence, for these values, credible interval (CrI) was reported in parentheses instead of confidence interval (CI), and we used <sup>†</sup> to distinguish. BCG = Bacillus Calmette - Guerin vaccine. DPT3 = three doses of diphtheria, pertussis, and tetanus vaccine. Polio3 = three doses of polio vaccine. HB3 = three doses of Hepatitis B vaccine. Composite prevention index and Composite treatment index were computed using meta-analysis.



**Appendix Table 4. Trends in Composite prevention index by various subgroups within China, 1993-2018**

|         | <b>1993</b>     | <b>1998</b>     | <b>2003</b>     | <b>2008</b>     | <b>2013</b>     | <b>2018</b>     |
|---------|-----------------|-----------------|-----------------|-----------------|-----------------|-----------------|
| overall | 65.6(52.1-77.9) | 71.1(55.8-84.3) | 75.0(59.1-88.0) | 78.8(63.6-90.7) | 84.2(73.6-92.5) | 87.7(81.8-92.6) |
| urban   | 81.7(68.6-91.9) | 84.7(75.1-92.2) | 87.5(79.9-93.4) | 85.9(79.7-91.2) | 87.0(81.2-91.9) | 88.2(84.1-91.7) |
| rural   | 58.2(38.0-76.9) | 65.7(43.5-84.7) | 69.9(46.1-89.0) | 75.7(53.2-92.5) | 81.5(64.8-93.7) | 85.5(74.9-93.6) |
| eastern | 76.4(61.2-88.7) | 80.6(64.3-92.8) | 81.9(67.2-92.9) | 82.6(69.8-92.4) | 86.4(77.6-93.3) | 88.5(83.0-93.1) |
| central | 64.3(48.5-78.7) | 70.2(53.1-84.7) | 73.0(56.3-86.9) | 76.7(60.0-89.9) | 83.0(71.9-91.7) | 86.8(79.1-92.9) |
| western | 59.4(44.4-73.6) | 66.3(49.1-81.5) | 72.2(54.7-86.7) | 77.2(60.0-90.7) | 83.4(70.9-93.0) | 87.0(78.5-93.6) |
| Q1      | 54.2(35.1-72.7) | 61.1(37.6-82.1) | 65.9(41.5-86.6) | 73.7(51.4-91.0) | 80.2(63.4-92.7) | 84.5(72.0-93.8) |
| Q2      | 57.8(36.5-77.6) | 67.6(45.7-86.0) | 71.0(49.0-88.8) | 77.9(59.1-92.1) | 83.7(70.9-93.3) | 87.6(79.1-94.1) |
| Q3      | 69.7(54.6-82.8) | 75.0(59.2-88.0) | 78.7(64.2-90.2) | 81.9(68.9-91.9) | 86.3(78.4-92.6) | 89.3(83.6-93.9) |
| Q4      | 80.4(69.0-89.7) | 83.3(73.6-91.1) | 86.0(78.4-92.2) | 86.6(80.0-92.0) | 88.2(83.1-92.6) | 90.7(86.4-94.2) |

Notes: Composite prevention index was computed using meta-analysis. Q1-Q4 represents income quartiles from the poorest to the richest. 95% confidence intervals are reported in parentheses.

**Appendix Table 5. Trends in Composite treatment index by various subgroups within China, 1993-2018**

|         | <b>1993</b>     | <b>1998</b>     | <b>2003</b>     | <b>2008</b>     | <b>2013</b>     | <b>2018</b>     |
|---------|-----------------|-----------------|-----------------|-----------------|-----------------|-----------------|
| overall | 57.1(43.5-70.1) | 57.4(47.5-67.1) | 62.1(52.2-71.4) | 68.0(58.4-76.8) | 74.8(66.2-82.6) | 75.5(66.6-83.5) |
| urban   | 65.2(50.2-78.9) | 63.5(50.9-75.3) | 67.0(52.4-80.1) | 71.5(61.4-80.7) | 75.6(67.4-83.0) | 77.0(69.9-83.4) |
| rural   | 53.9(36.7-70.6) | 55.8(45.7-65.8) | 60.3(51.2-69.0) | 66.1(56.0-75.5) | 74.5(64.6-83.3) | 74.6(63.9-84.0) |
| eastern | 62.8(49.4-75.3) | 62.5(51.8-72.7) | 67.9(55.3-79.3) | 72.6(61.3-82.6) | 75.6(66.5-83.8) | 76.8(66.6-85.7) |
| central | 57.1(41.7-71.9) | 58.1(45.8-69.9) | 61.6(49.0-73.5) | 67.8(56.3-78.3) | 73.5(64.2-81.9) | 75.6(65.6-84.4) |
| western | 53.4(39.7-66.8) | 54.2(45.0-63.3) | 58.0(50.0-65.9) | 64.8(56.4-72.8) | 74.5(65.6-82.5) | 74.3(66.6-81.3) |
| Q1      | 49.6(32.2-67.1) | 51.9(41.1-62.6) | 56.8(48.4-65.1) | 64.3(55.3-72.9) | 72.0(61.1-81.7) | 73.4(63.5-82.3) |
| Q2      | 55.0(37.9-71.5) | 57.6(47.2-67.6) | 61.5(51.3-71.2) | 67.1(56.5-77.0) | 75.2(64.7-84.4) | 75.2(65.8-83.6) |
| Q3      | 59.6(46.2-72.4) | 60.0(49.1-70.5) | 64.4(52.2-75.8) | 69.7(58.5-79.9) | 74.7(64.9-83.5) | 76.7(67.5-84.8) |
| Q4      | 66.5(53.5-78.4) | 64.1(52.5-74.9) | 69.4(55.6-81.6) | 71.9(61.8-81.1) | 76.9(67.4-85.3) | 78.3(69.7-85.8) |

Notes: Composite treatment index was computed using meta-analysis. Q1-Q4 represents income quartiles from the poorest to the richest. 95% confidence intervals are reported in parentheses.

**Appendix Table 6. Relative inequality index (RII) in 1993, 2008, and 2018**

| Indicators                                  | 1993-1995                    |                              |                | 2007-2009         |                  |                 | 2015-2018                    |                              |                 |
|---------------------------------------------|------------------------------|------------------------------|----------------|-------------------|------------------|-----------------|------------------------------|------------------------------|-----------------|
|                                             | Coverage (95% CI)            |                              | RII (95% CI)   | Coverage (95% CI) |                  | RII (95% CI)    | Coverage (95% CI)            |                              | RII (95% CI)    |
|                                             | Poorest quartile             | Richest quartile             |                | Poorest quartile  | Richest quartile |                 | Poorest quartile             | Richest quartile             |                 |
| <b>Prevention indicators</b>                |                              |                              |                |                   |                  |                 |                              |                              |                 |
| At least four antenatal care visits         | 5·8(5·3-6·2)                 | 56·5(55·2-57·7)              | 2·8(-0·7-6·4)  | 52·8(51·0-54·7)   | 87·7(85·3-90·0)  | 0·7(0·4-1·0)    | 85·8(84·6-87·0)              | 98·6(98·0-99·1)              | 0·2(0·1-0·3)    |
| Postnatal care of mother                    | 40·4(39·4-41·3)              | 41·5(40·4-42·6)              | 0·0(-1·2-1·2)  | 51·1(49·2-52·9)   | 71·5(68·3-74·7)  | 0·5(0·0-0·9)    | 68·9(67·3-70·5)              | 82·0(80·4-83·7)              | 0·2(0·1-0·3)    |
| BCG immunization                            | 81·5(51·8-95·9) <sup>†</sup> | 98·9(95·3-99·9) <sup>†</sup> | 0·3(0·1-0·4)   | 98·4(98·0-98·9)   | 99·7(99·3-100·1) | 0·0(0·0-0·0)    | 99·3(98·4-99·8) <sup>†</sup> | 99·1(97·3-99·8) <sup>†</sup> | 0·0(0·0-0·0)    |
| DPT3 immunization                           | 78·2(58·3-92·3) <sup>†</sup> | 93·6(84·8-97·8) <sup>†</sup> | 0·3(-0·1-0·7)  | 89·9(88·8-91·0)   | 92·5(90·4-94·5)  | 0·0(-0·1-0·1)   | 93·2(87·2-96·8) <sup>†</sup> | 91·3(84·5-95·8) <sup>†</sup> | 0·0(-0·2-0·1)   |
| Polio3 immunization                         | 77·4(49·9-93·0) <sup>†</sup> | 93·1(81·6-98·4) <sup>†</sup> | 0·3(0·1-0·4)   | 92·3(91·4-93·3)   | 92·6(90·6-94·7)  | 0·0(-0·1-0·1)   | 94·9(89·7-98·0) <sup>†</sup> | 92·9(85·7-97·4) <sup>†</sup> | 0·0(-0·1-0·0)   |
| Measles immunization                        | 66·2(33·6-88·6) <sup>†</sup> | 77·3(48·8-93·4) <sup>†</sup> | 0·2(-0·4-0·8)  | 91·9(90·9-92·9)   | 93·8(91·9-95·6)  | 0·0(0·0-0·0)    | 97·9(95·4-99·2) <sup>†</sup> | 98·1(95·7-99·3) <sup>†</sup> | 0·0(0·0-0·0)    |
| HB3 immunization                            | 34·6(9·0-72·6) <sup>†</sup>  | 91·3(75·5-98·1) <sup>†</sup> | 1·3(0·7-1·9)   | 91·8(90·8-92·8)   | 95·5(93·9-97·1)  | 0·0(0·0-0·1)    | 97·1(92·6-99·1) <sup>†</sup> | 94·1(86·5-97·9) <sup>†</sup> | 0·0(-0·1-0·0)   |
| Non-use of tobacco                          | 70·8(68·9-72·6)              | 69·8(67·9-71·7)              | 0·0(-0·1-0·1)  | 72·5(70·7-74·2)   | 75·0(73·3-76·6)  | 0·1(0·0-0·2)    | 76·2(74·6-77·8)              | 77·7(75·7-79·5)              | 0·0(0·0-0·1)    |
| Non-overweight                              | 83·8(82·0-85·4)              | 73·1(71·0-75·0)              | -0·2(-0·4-0·0) | 62·1(59·7-64·3)   | 54·2(52·0-56·4)  | -0·2(-0·4-0·1)  | 53·1(50·8-55·3)              | 49·7(47·1-52·3)              | -0·1(-0·3-0·1)  |
| Non-underweight                             | 90·9(89·5-92·2)              | 92·7(91·4-93·8)              | 0·0(0·0-0·1)   | 92·7(91·4-93·8)   | 94·9(93·8-95·8)  | 0·0(0·0-0·1)    | 94·7(93·5-95·6)              | 96·4(95·3-97·2)              | 0·0(0·0-0·1)    |
| Improved water                              | 15·9(15·3-16·5)              | 85·2(84·6-85·8)              | 2·2(0·4-4·0)   | 40·1(39·4-40·9)   | 82·8(82·1-83·5)  | 1·0(0·4-1·6)    | 65·4(64·8-66·0)              | 89·8(89·4-90·1)              | 0·4(0·3-0·6)    |
| Adequate sanitation                         | 9·0(8·5-9·5)                 | 59·6(58·8-60·4)              | 3·2(-2·3-8·8)  | 10·3(9·8-10·7)    | 71·2(70·4-72·1)  | 2·4(0·6-4·2)    | 42·2(41·6-42·8)              | 90·0(89·6-90·4)              | 1·0(0·5-1·4)    |
| <b>Treatment indicators</b>                 |                              |                              |                |                   |                  |                 |                              |                              |                 |
| Institutional delivery                      | 13·5(12·8-14·1)              | 79·5(78·6-80·4)              | 2·2(0·4-4·1)   | 80·5(79·1-82·0)   | 94·9(93·4-96·5)  | 0·2(0·1-0·4)    | 98·0(97·5-98·5)              | 99·0(98·6-99·5)              | 0·0(0·0-0·0)    |
| Skilled birth attendance                    | 62·8(61·8-63·7)              | 96·0(95·6-96·5)              | 0·5(0·3-0·8)   | 86·6(85·3-87·8)   | 96·8(95·5-98·1)  | 0·1(0·0-0·3)    | 96·5(93·2-98·5) <sup>†</sup> | 98·9(97·8-99·5) <sup>†</sup> | 0·0(0·0-0·1)    |
| Normal blood pressure                       | 89·3(88·1-90·4)              | 84·7(83·2-86·0)              | -0·1(-0·1-0·0) | 73·3(71·6-75·0)   | 68·9(67·0-70·7)  | -0·1(-0·3-0·1)  | 64·4(62·6-66·2)              | 62·6(60·2-64·9)              | 0·0(-0·2-0·1)   |
| Hypertension awareness                      | 22·8(18·0-28·4)              | 37·7(32·8-42·8)              | 0·6(0·4-0·8)   | 39·0(35·4-42·8)   | 55·1(51·6-58·6)  | 0·5(-0·4-1·3)   | 41·8(38·7-45·0)              | 50·9(47·0-54·8)              | 0·3(-0·2-0·8)   |
| Hypertension treatment                      | 11·2(7·9-15·5)               | 24·0(19·9-28·6)              | 0·9(-0·3-2·1)  | 29·4(26·1-33·0)   | 47·2(43·8-50·8)  | 0·7(-0·3-1·7)   | 32·9(30·0-36·0)              | 43·6(39·7-47·5)              | 0·4(-0·2-1·1)   |
| Hypertension control                        | 6·2(3·9-9·6)                 | 6·5(4·4-9·4)                 | 0·2(-1·6-2·0)  | 10·6(8·5-13·2)    | 14·6(12·3-17·3)  | 0·5(-0·8-1·8)   | 9·6(7·9-11·8)                | 16·1(13·3-19·2)              | 0·7(0·2-1·2)    |
| Tuberculosis treatment                      | 54·6(45·7-63·6)              | 62·5(38·8-86·2)              | 0·2(-0·3-0·6)  | 84·0(73·8-94·2)   | 64·7(42·0-87·4)  | -0·3(-0·6-0·0)  | 87·8(77·8-97·8)              | 100·0(100·0-100·0)           | 0·1(-0·5-0·7)   |
| Outpatient care seeking when needed         | 64·7(63·7-65·8)              | 61·8(60·6-62·9)              | -0·1(-0·2-0·1) | 60·4(59·4-61·4)   | 67·5(66·4-68·6)  | 0·1(-0·2-0·5)   | 87·8(87·4-88·2)              | 89·9(89·5-90·3)              | 0·0(-0·1-0·1)   |
| Outpatient care seeking when needed (0-4)   | 78·2(75·9-80·5)              | 81·3(77·9-84·8)              | 0·1(0·0-0·2)   | 77·0(73·7-80·3)   | 77·1(70·2-84·1)  | 0·0(-0·4-0·4)   | 88·7(86·8-90·6)              | 82·7(78·8-86·6)              | -0·1(-0·1-0·1)  |
| Inpatient care seeking when needed          | 66·4(64·6-68·2)              | 84·2(82·7-85·7)              | 0·3(0·3-0·4)   | 72·0(70·6-73·4)   | 82·8(81·2-84·4)  | 0·2(0·2-0·2)    | 74·8(74·0-75·6)              | 83·4(82·5-84·3)              | 0·1(0·1-0·2)    |
| Inpatient care seeking when needed (0-4)    | 79·4(75·1-83·7)              | 88·9(83·8-94·0)              | 0·1(0·0-0·3)   | 91·9(88·1-95·7)   | 89·8(81·3-98·3)  | 0·0(-0·2-0·2)   | 90·6(88·1-93·1)              | 91·9(88·1-95·7)              | 0·0(-0·1-0·2)   |
| Travel time to the nearest medical facility | 56·4(42·1-69·6) <sup>†</sup> | 72·7(62·8-81·8) <sup>†</sup> | 0·4(0·1-0·6)   | 59·7(58·9-60·5)   | 79·3(78·6-80·1)  | 0·4(0·2-0·5)    | 74·6(74·1-75·2)              | 84·4(83·9-84·9)              | 0·2(-0·2-0·5)   |
| <b>Financial protection</b>                 |                              |                              |                |                   |                  |                 |                              |                              |                 |
| Catastrophic health expenditure             | 3·9(3·0-4·8)                 | 2·7(1·8-3·6)                 | -0·5(-1·5-0·4) | 9·8(8·7-11·0)     | 6·0(5·2-6·8)     | -0·6(-1·1--0·1) | 5·5(5·2-5·9)                 | 2·3(2·1-2·5)                 | -1·2(-1·9--0·4) |
| Medical impoverishment                      | 3·4(2·5-4·3)                 | 0·2(0·0-0·4)                 | -2·9(-8·5-2·7) | 6·6(5·7-7·5)      | 0·1(0·0-0·2)     | -3·8(-12·0-4·4) | 6·9(6·5-7·3)                 | 0·1(0·1-0·2)                 | -4·4(-13·3-4·5) |

Notes: RII represents relative inequality index. Quartiles are divided by household income per capita. 95% confidence intervals are reported in parentheses. The results for immunization rates in 1993 and 2018, skilled birth attendance in 2018, and travel time to the nearest medical facility in 1993 were imputed using Bayesian linear regression. Hence, for these values, credible interval (CrI) was reported in parentheses instead of confidence interval (CI), and we used <sup>†</sup> to distinguish. BCG = Bacillus Calmette - Guerin vaccine. DPT3 = three doses of diphtheria, pertussis, and tetanus vaccine. Polio3 = three doses of polio vaccine. HB3 = three doses of Hepatitis B vaccine.

**Appendix Table 7. Trends in Catastrophic health expenditure by various subgroups within China, 1993-2018**

|         | <b>1995</b>  | <b>2002</b>  | <b>2007</b>    | <b>2013</b>  | <b>2018</b>  |
|---------|--------------|--------------|----------------|--------------|--------------|
| overall | 3·5(3·1-4·0) | 5·6(5·0-6·2) | 7·9(7·4-8·5)   | 5·1(4·7-5·5) | 3·6(3·5-3·7) |
| urban   | 3·3(2·8-3·7) | 4·7(4·2-5·2) | 7·7(7·0-8·5)   | 3·4(3·0-3·9) | 2·4(2·3-2·6) |
| rural   | 3·6(3·0-4·2) | 5·9(5·2-6·7) | 8·1(7·4-8·8)   | 6·8(6·3-7·3) | 5·0(4·8-5·2) |
| eastern | 3·2(2·4-4·0) | 4·6(3·8-5·4) | 6·2(5·5-6·9)   | 4·2(3·6-4·7) | 2·9(2·7-3·1) |
| central | 4·4(3·8-5·0) | 5·8(5·1-6·5) | 8·0(7·2-8·9)   | 5·6(5·0-6·2) | 3·9(3·7-4·2) |
| western | 3·0(1·9-4·1) | 6·8(5·2-8·5) | 10·7(9·4-12·0) | 6·1(5·3-6·9) | 3·5(3·2-3·7) |
| Q1      | 3·9(3·0-4·8) | 6·5(5·3-7·6) | 9·8(8·7-11·0)  | 7·8(6·9-8·7) | 5·5(5·2-5·9) |
| Q2      | 4·2(3·2-5·1) | 5·3(4·2-6·4) | 7·8(6·8-8·8)   | 6·2(5·4-7·0) | 3·9(3·6-4·1) |
| Q3      | 3·0(2·2-3·8) | 5·2(4·1-6·2) | 7·6(6·6-8·6)   | 3·5(2·9-4·1) | 2·9(2·6-3·1) |
| Q4      | 2·7(1·8-3·6) | 4·9(3·8-5·9) | 6·0(5·2-6·8)   | 3·3(2·7-3·9) | 2·3(2·1-2·5) |

Notes: Q1-Q4 represents income quartiles from the poorest to the richest by household income per capita. 95% confidence intervals are reported in parentheses.

**Appendix Table 8. Trends in Medical impoverishment by various subgroups within China, 1993-2018**

|         | 1995         | 2002          | 2007         | 2013         | 2018         |
|---------|--------------|---------------|--------------|--------------|--------------|
| overall | 1.4(1.1-1.8) | 1.2(1.0-1.5)  | 2.1(1.8-2.4) | 1.3(1.1-1.5) | 1.9(1.8-2.0) |
| urban   | 1.1(0.8-1.3) | 0.7(0.5-0.9)  | 0.4(0.2-0.5) | 0.2(0.1-0.3) | 0.7(0.6-0.7) |
| rural   | 1.5(1.1-2.0) | 1.4(1.0-1.8)  | 3.2(2.8-3.7) | 2.5(2.2-2.9) | 3.5(3.3-3.7) |
| eastern | 0.8(0.4-1.1) | 1.0(0.6-1.5)  | 1.2(0.9-1.5) | 0.8(0.5-1.0) | 1.1(1.0-1.2) |
| central | 1.6(1.3-2.0) | 1.7(1.2-2.1)  | 2.7(2.2-3.2) | 1.6(1.3-1.9) | 1.8(1.7-2.0) |
| western | 2.3(1.1-3.4) | 1.1(0.4-1.8)  | 2.8(2.0-3.5) | 1.9(1.5-2.3) | 2.7(2.5-2.9) |
| Q1      | 3.4(2.5-4.3) | 2.8(2.1-3.6)  | 6.6(5.7-7.5) | 5.0(4.3-5.7) | 6.9(6.5-7.3) |
| Q2      | 0.7(0.3-1.1) | 0.5(0.2-0.8)  | 0.6(0.3-0.8) | 0.4(0.2-0.7) | 0.9(0.8-1.1) |
| Q3      | 0.1(0.0-0.2) | 0.1(0.0-0.2)  | 0.2(0.0-0.3) | 0.1(0.0-0.2) | 0.3(0.2-0.4) |
| Q4      | 0.2(0.0-0.4) | 0.2(-0.1-0.5) | 0.1(0.0-0.2) | 0.0(0.0-0.0) | 0.1(0.1-0.2) |

Notes: Q1-Q4 represents income quartiles from the poorest to the richest by household income per capita. 95% confidence intervals are reported in parentheses.

**Appendix Table 9. Adjusted R squares used by general linear model, splines model and generalized additive model**

| <b>Indicator</b>                     | <b>General linear model</b> | <b>Splines model</b> | <b>Generalized additional model</b> |
|--------------------------------------|-----------------------------|----------------------|-------------------------------------|
| <b>Prevention indicators</b>         |                             |                      |                                     |
| ANC4                                 | 0.97                        | 0.98                 | 1.00                                |
| Postnatal care of mother             | 0.86                        | 0.94                 | 0.99                                |
| BCG immunization                     | 0.40                        | -                    | -                                   |
| DPT3 immunization                    | 1.00                        | -                    | -                                   |
| Polio3 immunization                  | 0.97                        | -                    | -                                   |
| Measles immunization                 | 0.09                        | -                    | -                                   |
| HB3 immunization                     | 0.50                        | -                    | -                                   |
| Non-use of tobacco                   | 0.89                        | 0.89                 | 0.94                                |
| Non-overweight                       | 0.99                        | 1.00                 | 1.00                                |
| Non-underweight                      | 0.88                        | 0.90                 | 0.88                                |
| Improved water                       | 0.90                        | 0.94                 | 0.91                                |
| Adequate sanitation                  | 0.88                        | 0.99                 | 0.98                                |
| <b>Composite prevention index</b>    | 0.99                        | 1.00                 | 0.99                                |
| <b>Treatment indicators</b>          |                             |                      |                                     |
| Institutional delivery               | 0.98                        | 0.99                 | 1.00                                |
| Skilled birth attendance             | 0.78                        | 1.00                 | 1.00                                |
| Normal blood pressure                | 0.97                        | 0.96                 | 0.96                                |
| Hypertension awareness               | 0.66                        | 0.54                 | 0.83                                |
| Hypertension treatment               | 0.85                        | 0.81                 | 0.94                                |
| Hypertension control                 | 0.71                        | 0.69                 | 0.76                                |
| Tuberculosis treatment               | 0.77                        | 0.84                 | 0.81                                |
| Outpatient care seeking              | 0.41                        | 0.95                 | 0.93                                |
| Outpatient care seeking (aged 0-4)   | 0.38                        | 0.68                 | 0.56                                |
| Inpatient care seeking               | 0.30                        | 0.84                 | 0.73                                |
| Inpatient care seeking (aged 0-4)    | 0.30                        | 0.84                 | 0.73                                |
| Time to the nearest medical facility | 0.63                        | 0.87                 | 0.99                                |
| <b>Composite treatment index</b>     | 0.93                        | 0.92                 | 0.98                                |

Note: Restricted cubic splines model with three knots and generalized additive model with three degrees of freedom were used to fit the observed data. The reason of selecting three knots and three degrees of freedom was that there were no obvious advantages when using higher knots and degrees. We performed logit transformation on the proportion before the analysis. ANC4 = At least four antenatal care visits; BCG = Bacillus Calmette - Guerin vaccine. DPT3 = three doses of diphtheria, pertussis, and tetanus vaccine. Polio3 = three doses of polio vaccine. HB3 = three doses of Hepatitis B vaccine.

**Appendix Table 10. Sensitivity analysis of projections based on trends from 1993 to 2008**

|                                      | Predicted coverage (95% CrI) |                 | Observed coverage (95% CI) |                 |
|--------------------------------------|------------------------------|-----------------|----------------------------|-----------------|
|                                      | 2011-2013                    | 2015-2018       | 2011-2013                  | 2015-2018       |
| <b>Prevention indicators</b>         |                              |                 |                            |                 |
| <i>Composite prevention index</i>    | 82.2(75.8-87.9)              | 85.1(77.1-90.9) | 84.2(73.6-92.5)            | 87.7(81.8-92.6) |
| ANC4                                 | 78.9(67.3-87.8)              | 86.9(75.1-94.3) | 81.4(80.7-82.1)            | 92.9(92.4-93.4) |
| Postnatal care of mother             | 59.1(45.9-71.4)              | 61.8(44.5-77.2) | 64.2(63.3-65.1)            | 74.6(73.8-75.4) |
| BCG immunization                     | 99.6(98.6-99.9)              | -               | 98.7(98.5-98.9)            | -               |
| DPT3 immunization                    | 91.2(76.9-98.1)              | -               | 92.5(92.1-92.9)            | -               |
| Polio3 immunization                  | 93.5(83.3-98.4)              | -               | 93.7(93.3-94.1)            | -               |
| Measles immunization                 | 87.6(67.9-96.8)              | -               | 97.3(97.0-97.6)            | -               |
| HB3 immunization                     | 97.5(92.5-99.4)              | -               | 93.3(92.9-93.7)            | -               |
| Non-use of tobacco                   | 74.0(67.4-80.2)              | 74.6(65.8-82.3) | 74.5(73.6-75.3)            | 76.5(75.7-77.3) |
| Non-overweight                       | 55.3(44.1-65.3)              | 49.2(34.9-62.8) | 55.9(54.8-57.1)            | 51.4(50.3-52.6) |
| Non-underweight                      | 94.8(92.3-96.8)              | 95.3(92.2-97.5) | 95.1(94.6-95.6)            | 95.3(94.8-95.7) |
| Improved water                       | 61.5(48.3-71.8)              | 65.7(48.3-78.5) | 75.0(74.7-75.3)            | 77.9(77.6-78.2) |
| Adequate sanitation                  | 37.2(24.6-50.8)              | 42.1(25.7-60.8) | 54.1(53.8-54.4)            | 68.5(68.2-68.8) |
| <b>Treatment indicators</b>          |                              |                 |                            |                 |
| <i>Composite treatment index</i>     | 70.0(57.1-80.9)              | 73.0(55.6-85.7) | 74.8(66.2-82.6)            | 75.5(66.6-83.5) |
| Institutional delivery               | 93.1(86.5-96.9)              | 96.7(91.6-98.9) | 96.3(96.0-96.6)            | 98.6(98.4-98.8) |
| Skilled birth attendance             | 92.5(85.9-96.6)              | -               | 97.3(97.0-97.6)            | -               |
| Normal blood pressure                | 69.8(60.4-76.8)              | 64.6(52.1-74.4) | 73.6(72.7-74.4)            | 64.0(63.0-65.0) |
| Hypertension awareness               | 45.0(30.3-59.2)              | 49.4(30.5-67.2) | 52.3(50.4-54.2)            | 44.7(43.0-46.4) |
| Hypertension treatment               | 37.3(25.2-50.3)              | 43.8(27.1-60.8) | 42.5(40.7-44.4)            | 36.8(35.1-38.4) |
| Hypertension control                 | 13.8(7.8-21.9)               | 17.3(8.4-30.3)  | 15.0(13.7-16.4)            | 11.8(10.8-13.0) |
| Tuberculosis treatment               | 76.1(59.4-88.0)              | 78.4(55.5-92.3) | 83.0(75.4-90.6)            | 90.6(84.4-96.8) |
| Outpatient care seeking              | 56.1(37.2-73.3)              | 54.6(30.3-77.3) | 72.7(72.4-73.0)            | 88.2(88.0-88.4) |
| Outpatient care seeking (aged 0-4)   | 77.9(65.6-87.8)              | 77.1(59.3-90.0) | 85.6(83.9-87.3)            | 85.8(84.7-87.0) |
| Inpatient care seeking               | 74.5(58.0-87.3)              | 75.1(52.1-90.6) | 82.8(82.3-83.3)            | 78.5(78.1-78.9) |
| Inpatient care seeking (aged 0-4)    | 95.1(90.4-97.7)              | 96.3(91.0-98.8) | 92.6(91.1-94.1)            | 90.6(89.2-91.9) |
| Time to the nearest medical facility | 72.7(65.5-79.9)              | 73.8(63.3-83.6) | 73.6(73.4-73.9)            | 81.7(81.5-82.0) |

Note: Sensitivity analysis of UHC service coverage indicators was performed using trends from 1993 to 2008. BCG = Bacillus Calmette - Guerin vaccine. DPT3 = three doses of diphtheria, pertussis, and tetanus vaccine. Polio3 = three doses of polio vaccine. HB3 = three doses of Hepatitis B vaccine. CrI = credible interval.

**Appendix Table 11. Sensitivity analysis of UHC indicators based on trends from 2003 and 2018.**

|                                                | Predicted coverage in year (95% credible interval) |                  | Probability of reaching UHC targets |
|------------------------------------------------|----------------------------------------------------|------------------|-------------------------------------|
|                                                | 2025                                               | 2030             |                                     |
| <b>Prevention indicators</b>                   |                                                    |                  |                                     |
| At least four antenatal care visits            | 97·0(93·8-98·8)                                    | 98·5(96·3-99·6)  | 100·0                               |
| Postnatal care of mother                       | 80·3(66·9-89·9)                                    | 84·5(68·9-93·9)  | 82·6                                |
| BCG immunization                               | 99·6(98·4-100·0)                                   | 99·7(98·6-100·0) | 100·0                               |
| DPT3 immunization                              | 95·2(88·0-98·4)                                    | 95·9(87·7-99·1)  | 99·2                                |
| Polio3 immunization                            | 96·1(88·8-99·1)                                    | 96·6(87·5-99·5)  | 99·7                                |
| Measles immunization                           | 97·9(91·1-99·8)                                    | 98·2(89·6-99·9)  | 99·6                                |
| HB3 immunization                               | 98·2(93·8-99·8)                                    | 98·8(94·7-99·9)  | 99·8                                |
| Non-use of tobacco                             | 78·0(62·8-88·6)                                    | 78·9(59·4-91·3)  | 49·5                                |
| Non-overweight                                 | 39·9(24·1-56·2)                                    | 34·6(16·9-56·1)  | 0·1                                 |
| Non-underweight                                | 95·4(90·3-98·1)                                    | 95·5(88·5-98·6)  | 99·6                                |
| Improved water                                 | 86·8(76·3-93·6)                                    | 90·7(79·9-96·7)  | 97·5                                |
| Adequate sanitation                            | 82·6(70·0-91·4)                                    | 89·4(77·6-96·0)  | 95·4                                |
| <b>Treatment indicators</b>                    |                                                    |                  |                                     |
| Institutional delivery                         | 99·7(99·5-99·9)                                    | 99·9(99·8-100·0) | 100·0                               |
| Skilled birth attendance                       | 99·6(98·9-99·9)                                    | 99·8(99·4-100·0) | 100·0                               |
| Normal blood pressure                          | 51·4(29·6-73·3)                                    | 44·5(18·9-73·0)  | 1·1                                 |
| Hypertension awareness                         | 56·2(29·5-78·2)                                    | 59·5(24·7-85·3)  | 8·8                                 |
| Hypertension treatment                         | 52·8(26·4-77·8)                                    | 57·9(24·4-86·0)  | 7·3                                 |
| Hypertension control                           | 16·2(5·5-34·0)                                     | 17·9(4·6-43·4)   | 0·2                                 |
| Tuberculosis treatment                         | 94·8(90·9-97·3)                                    | 96·8(93·2-98·7)  | 100·0                               |
| Outpatient care seeking when needed            | 93·4(86·7-97·3)                                    | 96·2(90·5-98·9)  | 100·0                               |
| Outpatient care seeking when needed (aged 0-4) | 89·5(81·0-94·7)                                    | 91·2(81·1-96·4)  | 98·4                                |
| Inpatient care seeking when needed             | 83·4(70·4-92·7)                                    | 84·8(68·4-94·9)  | 80·5                                |
| Inpatient care seeking when needed (aged 0-4)  | 89·2(82·4-93·7)                                    | 87·8(77·8-94·0)  | 95·5                                |
| Travel time to the nearest medical facility    | 83·2(71·0-91·5)                                    | 85·4(69·9-94·4)  | 84·8                                |
| <b>Financial protection</b>                    |                                                    |                  |                                     |
| Catastrophic health expenditure                | 2·2(0·9-4·7)                                       | 1·6(0·5-4·0)     | 0·0                                 |
| Medical impoverishment                         | 1·8(0·5-4·5)                                       | 1·9(0·3-6·4)     | 0·0                                 |

Note: Sensitivity analysis of UHC service coverage indicators was performed using trends from 2003 and onwards. Projections of financial protection indicators were performed using trends from 2007 and onwards. 95% credible intervals are reported in parentheses. BCG = Bacillus Calmette - Guerin vaccine. DPT3 = three doses of diphtheria, pertussis, and tetanus vaccine. Polio3 = three doses of polio vaccine. HB3 = three doses of Hepatitis B vaccine.



**Appendix Table 12. Results for composite prevention and treatment index using projections of CHNS indicators**

| <b>Panel A</b>                                                        | <b>1993</b>     | <b>1997-1998</b> | <b>2003-2004</b> | <b>2008-2009</b> | <b>2011-2013</b> | <b>2015-2018</b> |
|-----------------------------------------------------------------------|-----------------|------------------|------------------|------------------|------------------|------------------|
| Calculated by observed data in different survey years                 |                 |                  |                  |                  |                  |                  |
| Composite prevention index                                            | 65·6(52·1-77·9) | 71·1(55·8-84·3)  | 75·0(59·1-88·0)  | 78·8(63·6-90·8)  | 84·2(73·6-92·5)  | 87·7(81·8-92·6)  |
| Composite treatment index                                             | 57·1(43·5-70·1) | 57·4(47·5-67·1)  | 62·1(52·3-71·4)  | 68·0(58·4-76·8)  | 74·8(66·2-82·5)  | 75·5(66·6-83·5)  |
| <b>Panel B</b>                                                        | <b>1993</b>     | <b>1998</b>      | <b>2003</b>      | <b>2008</b>      | <b>2013</b>      | <b>2018</b>      |
| Calculated by mixture of observed and predicted data in the same year |                 |                  |                  |                  |                  |                  |
| Composite prevention index                                            | 65·6(52·1-77·9) | 71·1(57·2-83·2)  | 75·1(58·8-88·3)  | 79·0(63·1-91·2)  | 84·1(73·2-92·6)  | 87·4(81·8-92·2)  |
| Composite treatment index                                             | 57·1(43·5-70·1) | 58·9(49·6-68·0)  | 61·6(51·5-71·2)  | 67·7(58·2-76·4)  | 73·7(64·9-81·6)  | 77·3(70·2-83·6)  |

Notes: Panel A shows the results for composite prevention and treatment index using observed data from CHNS and NHSS. In this panel, we regard adjacent years as the same period to address inconsistencies in the timing of survey waves. In Panel B, we make projections of CHNS indicators in 1998, 2003, 2008, 2013 and 2018, and combine these predicted data with observed data from NHSS to calculate the composite prevention and treatment index. 95% confidence intervals are reported in parentheses.

**Appendix Table 13. Sensitive analysis of meta-analysis**

| <b>dropped indicators</b>            | <b>1993</b>     | <b>1998</b>     | <b>2003</b>     | <b>2008</b>     | <b>2013</b>     | <b>2018</b>     |
|--------------------------------------|-----------------|-----------------|-----------------|-----------------|-----------------|-----------------|
| <b>Prevention indicators</b>         |                 |                 |                 |                 |                 |                 |
| No drop                              | 65.6(52.1-77.9) | 71.1(55.8-84.3) | 75.0(59.1-88.0) | 78.8(63.6-90.8) | 84.2(73.6-92.5) | 87.7(81.8-92.6) |
| ANC4                                 | 69.4(55.1-82.0) | 73.5(57.4-86.9) | 76.7(59.8-90.1) | 79.9(63.7-92.2) | 84.4(73.1-93.1) | 87.1(81.3-92.0) |
| Postnatal care of mother             | 67.3(51.3-81.4) | 72.7(56.5-86.3) | 76.8(59.8-90.1) | 80.6(64.7-92.7) | 85.7(74.7-94.0) | 88.7(82.4-93.7) |
| BCG immunization                     | 63.2(49.2-76.1) | 68.5(52.7-82.4) | 72.4(56.3-86.0) | 76.0(60.8-88.4) | 82.2(71.5-90.8) | 86.0(79.8-91.2) |
| DPT3 immunization                    | 64.0(50.0-76.9) | 69.7(53.7-83.5) | 73.6(56.9-87.4) | 77.6(61.5-90.3) | 83.3(72.0-92.2) | 87.0(80.8-92.2) |
| Polio3 immunization                  | 63.8(49.8-76.7) | 69.5(53.6-83.3) | 73.4(56.8-87.2) | 77.3(61.3-90.0) | 83.2(71.9-92.0) | 86.9(80.7-92.0) |
| Measles immunization                 | 63.8(49.8-76.7) | 69.3(53.4-83.1) | 72.7(56.4-86.4) | 77.4(61.3-90.1) | 82.6(71.6-91.3) | 86.5(80.3-91.7) |
| HB3 immunization                     | 66.2(52.0-79.0) | 71.0(55.0-84.8) | 74.5(57.5-88.3) | 77.2(61.2-89.9) | 83.2(71.9-92.1) | 86.6(80.4-91.8) |
| Non-use of tobacco                   | 65.1(51.2-77.8) | 71.1(54.8-84.9) | 75.1(58.0-88.9) | 79.3(62.8-91.8) | 85.0(73.8-93.5) | 88.5(82.3-93.6) |
| Non-overweight                       | 64.2(50.6-76.7) | 70.9(54.8-84.6) | 75.9(58.9-89.5) | 80.4(64.2-92.5) | 86.2(75.5-94.2) | 90.0(84.6-94.4) |
| Non-underweight                      | 62.7(50.0-74.4) | 68.6(54.2-81.4) | 72.7(56.3-86.4) | 77.0(61.1-89.7) | 82.9(71.6-91.8) | 86.8(80.9-91.8) |
| Improved water                       | 67.5(50.9-82.1) | 73.2(52.2-89.8) | 76.8(57.4-91.7) | 80.5(62.0-93.9) | 85.0(71.5-94.7) | 88.5(80.0-94.8) |
| Adequate sanitation                  | 69.5(56.0-81.6) | 75.2(62.1-86.2) | 78.8(66.1-89.1) | 82.2(70.0-91.8) | 86.4(77.8-93.1) | 89.1(82.2-94.4) |
| <b>Treatment indicators</b>          |                 |                 |                 |                 |                 |                 |
| No drop                              | 57.1(43.5-70.1) | 57.4(47.5-67.1) | 62.1(52.3-71.4) | 68.0(58.4-76.8) | 74.8(66.2-82.5) | 75.5(66.6-83.5) |
| Institutional delivery               | 58.7(47.8-69.3) | 58.1(47.6-68.2) | 61.5(50.6-71.8) | 65.7(56.0-74.9) | 72.1(63.7-79.7) | 72.3(63.2-80.5) |
| Skilled birth attendance             | 54.7(40.4-68.6) | 55.2(44.7-65.5) | 59.8(49.7-69.5) | 65.2(55.9-74.0) | 71.8(63.7-79.3) | 72.7(63.1-81.4) |
| Normal blood pressure                | 53.9(40.0-67.5) | 54.7(44.6-64.7) | 60.5(49.8-70.7) | 67.6(56.9-77.3) | 74.9(65.5-83.2) | 76.5(67.3-84.6) |
| Hypertension awareness               | 59.4(45.4-72.8) | 60.6(50.8-69.9) | 64.3(54.3-73.6) | 70.0(60.4-78.9) | 76.7(67.9-84.4) | 78.0(69.3-85.7) |
| Hypertension treatment               | 60.9(47.1-73.9) | 61.5(52.1-70.4) | 65.2(55.6-74.2) | 70.8(61.4-79.3) | 77.4(68.9-84.9) | 78.6(70.2-86.0) |
| Hypertension control                 | 62.6(49.1-75.1) | 63.2(54.8-71.1) | 67.0(58.5-75.0) | 73.2(65.5-80.2) | 79.8(72.4-86.2) | 80.8(73.8-87.0) |
| Tuberculosis treatment               | 56.9(42.7-70.5) | 55.9(45.5-66.0) | 61.7(51.5-71.5) | 67.4(57.4-76.6) | 74.1(65.0-82.2) | 74.1(64.6-82.6) |
| Outpatient care seeking              | 56.5(40.0-72.2) | 57.0(44.0-69.6) | 63.1(52.7-72.8) | 68.5(56.9-79.0) | 75.0(63.7-84.8) | 74.3(62.3-84.6) |
| Outpatient care seeking (aged 0-4)   | 54.8(40.5-68.6) | 55.1(44.6-65.3) | 60.7(50.3-70.6) | 66.7(56.7-76.1) | 73.7(64.5-81.9) | 74.5(64.9-83.0) |
| Inpatient care seeking               | 55.3(40.6-69.6) | 56.8(45.8-67.5) | 61.1(50.3-71.3) | 67.1(56.5-76.9) | 74.0(64.1-82.8) | 75.3(64.7-84.5) |
| Inpatient care seeking (aged 0-4)    | 54.5(40.3-68.3) | 54.5(44.1-64.7) | 58.6(48.3-68.5) | 65.2(55.2-74.6) | 72.8(63.6-81.1) | 73.9(64.3-82.5) |
| Time to the nearest medical facility | 56.5(42.2-70.3) | 56.4(42.7-69.6) | 61.2(48.6-73.1) | 67.8(55.0-79.4) | 74.9(63.1-85.1) | 75.0(62.3-85.9) |

Note: ANC4 = At least four antenatal care visits; BCG = Bacillus Calmette - Guerin vaccine. DPT3 = three doses of diphtheria, pertussis, and tetanus vaccine. Polio3 = three doses of polio vaccine. HB3 = three doses of Hepatitis B vaccine. In this table, we dropped an indicator every time and then calculated the composite prevention and treatment index again to see whether the results would change substantially. 95% confidence intervals are reported in parentheses.

**Appendix Table 14. Confidence intervals (CIs) of composite prevention and treatment index after applying multiplicity correction**

|                                   | 1993            | 1998            | 2003            | 2008            | 2013            | 2018            | Differences |           |           |
|-----------------------------------|-----------------|-----------------|-----------------|-----------------|-----------------|-----------------|-------------|-----------|-----------|
|                                   |                 |                 |                 |                 |                 |                 | 1993-2008   | 2008-2018 | 1993-2018 |
| <b>Composite prevention index</b> |                 |                 |                 |                 |                 |                 |             |           |           |
| Urban                             | 81.7(81.3-82.1) | 84.7(84.2-85.1) | 87.5(87.1-87.9) | 85.9(85.5-86.3) | 87.0(86.8-87.2) | 88.2(87.9-88.4) | p< 0.0001   | p< 0.0001 | p< 0.0001 |
| Rural                             | 58.2(57.8-58.5) | 65.7(65.3-66.0) | 69.9(69.5-70.2) | 75.7(75.4-76.0) | 81.5(81.3-81.8) | 85.5(85.3-85.8) | p< 0.0001   | p< 0.0001 | p< 0.0001 |
| Eastern                           | 76.4(76.0-76.8) | 80.6(80.1-81.1) | 81.9(81.5-82.3) | 82.6(82.2-83.0) | 86.4(86.1-86.7) | 88.5(88.2-88.8) | p< 0.0001   | p< 0.0001 | p< 0.0001 |
| Central                           | 64.3(63.8-64.8) | 70.2(69.6-70.7) | 73.0(72.5-73.5) | 76.7(76.2-77.2) | 83.0(82.6-83.3) | 86.8(86.5-87.1) | p< 0.0001   | p< 0.0001 | p< 0.0001 |
| Western                           | 59.4(59.0-59.9) | 66.3(65.7-66.8) | 72.2(71.7-72.6) | 77.2(76.8-77.7) | 83.4(83.1-83.8) | 87.0(86.7-87.3) | p< 0.0001   | p< 0.0001 | p< 0.0001 |
| Q1                                | 54.2(53.7-54.7) | 61.1(60.4-61.7) | 65.9(65.4-66.5) | 73.7(73.2-74.2) | 80.2(79.8-80.5) | 84.5(84.1-84.8) | p< 0.0001   | p< 0.0001 | p< 0.0001 |
| Q2                                | 57.8(57.2-58.3) | 67.6(67.0-68.2) | 71.0(70.5-71.6) | 77.9(77.4-78.4) | 83.7(83.3-84.0) | 87.6(87.2-87.9) | p< 0.0001   | p< 0.0001 | p< 0.0001 |
| Q3                                | 69.7(69.2-70.2) | 75.0(74.5-75.6) | 78.7(78.2-79.2) | 81.9(81.4-82.4) | 86.3(85.9-86.6) | 89.3(89.0-89.6) | p< 0.0001   | p< 0.0001 | p< 0.0001 |
| Q4                                | 80.4(79.9-80.9) | 83.3(82.8-83.8) | 86.0(85.5-86.5) | 86.6(86.1-87.1) | 88.2(87.9-88.6) | 90.7(90.3-91.0) | p< 0.0001   | p< 0.0001 | p< 0.0001 |
| <b>Composite treatment index</b>  |                 |                 |                 |                 |                 |                 |             |           |           |
| Urban                             | 65.2(64.6-65.9) | 63.5(62.9-64.2) | 67.0(66.3-67.6) | 71.5(70.9-72.2) | 75.6(75.3-76.0) | 77.0(76.7-77.3) | p< 0.0001   | p< 0.0001 | p< 0.0001 |
| Rural                             | 53.9(53.5-54.3) | 55.8(55.4-56.3) | 60.3(59.8-60.7) | 66.1(65.7-66.5) | 74.5(74.2-74.9) | 74.6(74.3-74.9) | p< 0.0001   | p< 0.0001 | p< 0.0001 |
| Eastern                           | 62.8(62.2-63.4) | 62.5(61.9-63.2) | 67.9(67.2-68.5) | 72.6(72.1-73.2) | 75.6(75.2-76.1) | 76.8(76.5-77.2) | p< 0.0001   | p< 0.0001 | p< 0.0001 |
| Central                           | 57.1(56.5-57.8) | 58.1(57.4-58.8) | 61.6(60.9-62.3) | 67.8(67.2-68.5) | 73.5(73.1-74.0) | 75.6(75.2-76.0) | p< 0.0001   | p< 0.0001 | p< 0.0001 |
| Western                           | 53.4(52.8-54.0) | 54.2(53.6-54.9) | 58.0(57.4-58.6) | 64.8(64.2-65.4) | 74.5(74.1-75.0) | 74.3(73.9-74.7) | p< 0.0001   | p< 0.0001 | p< 0.0001 |
| Q1                                | 49.6(48.9-50.3) | 51.9(51.1-52.6) | 56.8(56.1-57.6) | 64.3(63.7-65.0) | 72.0(71.4-72.5) | 73.4(73.0-73.8) | p< 0.0001   | p< 0.0001 | p< 0.0001 |
| Q2                                | 55.0(54.3-55.7) | 57.6(56.8-58.4) | 61.5(60.7-62.2) | 67.1(66.5-67.8) | 75.2(74.6-75.8) | 75.2(74.8-75.6) | p< 0.0001   | p< 0.0001 | p< 0.0001 |
| Q3                                | 59.6(58.9-60.3) | 60.0(59.3-60.8) | 64.4(63.7-65.1) | 69.7(69.0-70.4) | 74.7(74.2-75.3) | 76.7(76.3-77.2) | p< 0.0001   | p< 0.0001 | p< 0.0001 |
| Q4                                | 66.5(65.8-67.2) | 64.1(63.3-64.9) | 69.4(68.6-70.1) | 71.9(71.2-72.7) | 76.9(76.3-77.6) | 78.3(77.8-78.7) | p< 0.0001   | p< 0.0001 | p< 0.0001 |

Note: 99.44% (100% - 5%/9) confidence intervals are reported in parentheses.

**Appendix Table 15. Confidence intervals (CIs) of financial protection indicators after applying multiplicity correction**

|                         | 1995          | 2002          | 2007           | 2013         | 2018         | Differences |           |           |
|-------------------------|---------------|---------------|----------------|--------------|--------------|-------------|-----------|-----------|
|                         |               |               |                |              |              | 1995-2007   | 2007-2018 | 1995-2018 |
| <b>Incidence of CHE</b> |               |               |                |              |              |             |           |           |
| Urban                   | 3.3(2.7-3.9)  | 4.7(4.0-5.4)  | 7.7(6.7-8.7)   | 3.4(2.8-4.0) | 2.4(2.2-2.6) | p< 0.0001   | p< 0.0001 | p< 0.0001 |
| Rural                   | 3.6(2.9-4.3)  | 5.9(5.0-6.8)  | 8.1(7.3-8.9)   | 6.8(6.1-7.5) | 5.0(4.7-5.3) | p< 0.0001   | p< 0.0001 | p< 0.0001 |
| Eastern                 | 3.2(2.4-4.0)  | 4.6(3.7-5.5)  | 6.2(5.3-7.1)   | 4.2(3.4-5.0) | 2.9(2.6-3.2) | p< 0.0001   | p< 0.0001 | p= 0.29   |
| Central                 | 4.4(3.6-5.2)  | 5.8(4.9-6.7)  | 8.0(6.9-9.1)   | 5.6(4.8-6.4) | 3.9(3.6-4.2) | p< 0.0001   | p< 0.0001 | p= 0.08   |
| Western                 | 3.0(2.0-4.0)  | 6.8(5.4-8.2)  | 10.7(9.0-12.4) | 6.1(5.1-7.1) | 3.5(3.2-3.8) | p< 0.0001   | p< 0.0001 | p= 0.19   |
| Q1                      | 3.9(2.9-4.9)  | 6.5(5.3-7.7)  | 9.8(8.4-11.2)  | 7.8(6.6-9.0) | 5.5(5.0-6.0) | p< 0.0001   | p< 0.0001 | p= 0.0003 |
| Q2                      | 4.2(3.2-5.2)  | 5.3(4.2-6.4)  | 7.8(6.5-9.1)   | 6.2(5.2-7.2) | 3.9(3.5-4.3) | p< 0.0001   | p< 0.0001 | p= 0.43   |
| Q3                      | 3.0(2.1-3.9)  | 5.2(4.1-6.3)  | 7.6(6.3-8.9)   | 3.5(2.7-4.3) | 2.9(2.5-3.3) | p< 0.0001   | p< 0.0001 | p= 0.72   |
| Q4                      | 2.7(1.9-3.5)  | 4.9(3.8-6.0)  | 6.0(4.8-7.2)   | 3.3(2.5-4.1) | 2.3(2.0-2.6) | p< 0.0001   | p< 0.0001 | p= 0.18   |
| <b>Incidence of MI</b>  |               |               |                |              |              |             |           |           |
| Urban                   | 1.1(0.8-1.4)  | 0.7(0.4-1.0)  | 0.4(0.2-0.6)   | 0.2(0.0-0.4) | 0.7(0.6-0.8) | p< 0.0001   | p= 0.02   | p= 0.0005 |
| Rural                   | 1.5(1.0-2.0)  | 1.4(1.0-1.8)  | 3.2(2.7-3.7)   | 2.5(2.1-2.9) | 3.5(3.2-3.8) | p< 0.0001   | p= 0.19   | p< 0.0001 |
| Eastern                 | 0.8(0.4-1.2)  | 1.0(0.6-1.4)  | 1.2(0.8-1.6)   | 0.8(0.5-1.1) | 1.1(0.9-1.3) | p= 0.06     | p= 0.54   | p= 0.08   |
| Central                 | 1.6(1.1-2.1)  | 1.7(1.2-2.2)  | 2.7(2.0-3.4)   | 1.6(1.2-2.0) | 1.8(1.6-2.0) | p= 0.0001   | p< 0.0001 | p= 0.29   |
| Western                 | 2.3(1.5-3.1)  | 1.1(0.5-1.7)  | 2.8(1.9-3.7)   | 1.9(1.3-2.5) | 2.7(2.4-3.0) | p= 0.28     | p= 0.81   | p= 0.24   |
| Q1                      | 3.4(2.5-4.3)  | 2.8(2.0-3.6)  | 6.6(5.4-7.8)   | 5.0(4.0-6.0) | 6.9(6.4-7.4) | p< 0.0001   | p= 0.52   | p< 0.0001 |
| Q2                      | 0.7(0.3-1.1)  | 0.5(0.1-0.9)  | 0.6(0.2-1.0)   | 0.4(0.1-0.7) | 0.9(0.7-1.1) | p= 0.66     | p= 0.11   | p= 0.28   |
| Q3                      | 0.1(-0.1-0.3) | 0.1(-0.1-0.3) | 0.2(0.0-0.4)   | 0.1(0.0-0.2) | 0.3(0.2-0.4) | p= 0.33     | p= 0.27   | p= 0.04   |
| Q4                      | 0.2(0.0-0.4)  | 0.2(0.0-0.4)  | 0.1(-0.1-0.3)  | 0.0(0.0-0.0) | 0.1(0.0-0.2) | p= 0.29     | p= 0.93   | p= 0.15   |

Note: 99.44% (100% - 5%/9) confidence intervals are reported in parentheses.
